# Supplementary material for: Subtyping-based platform guides precision medicine for heavily pretreated metastatic triple-negative breast cancer: The FUTURE phase II umbrella clinical trial
Source: PubMed Central journal article supplement (PMC10156707; doi:10.1038/s41422-023-00795-2), 2023-03-27
Supplement: 41422_2023_795_MOESM2_ESM.pdf [file 41422_2023_795_MOESM2_ESM.pdf]

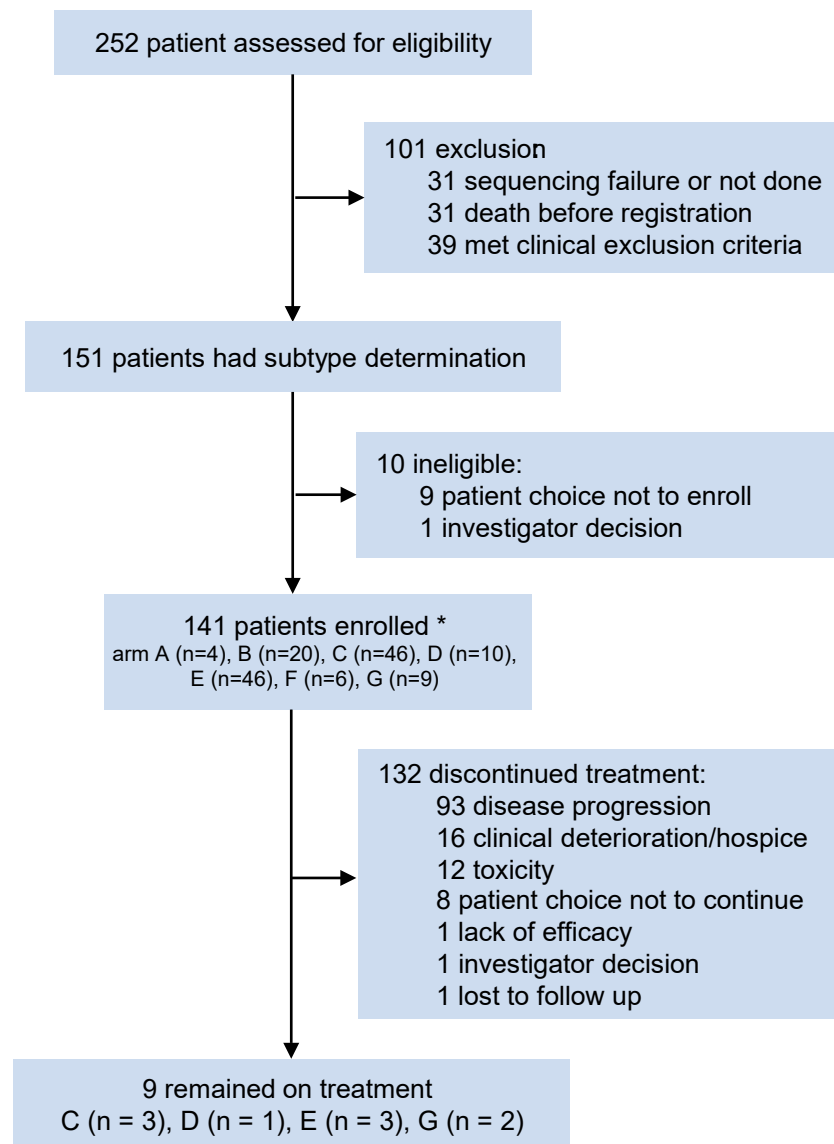

**Fig. S1 Trial profile.**

\*Tumor biopsies were collected to conduct immunohistochemistry staining for triple-negative breast cancer subtyping and next-generation sequencing. Patients were assigned to one of seven parallel treatment arms based on their subtype and sequencing results. n, number.
