# Supplementary material for: Subtyping-based platform guides precision medicine for heavily pretreated metastatic triple-negative breast cancer: The FUTURE phase II umbrella clinical trial
Source: PubMed Central journal article supplement (PMC10156707; doi:10.1038/s41422-023-00795-2), 2023-03-27
Supplement: 41422_2023_795_MOESM4_ESM.pdf [file 41422_2023_795_MOESM4_ESM.pdf]

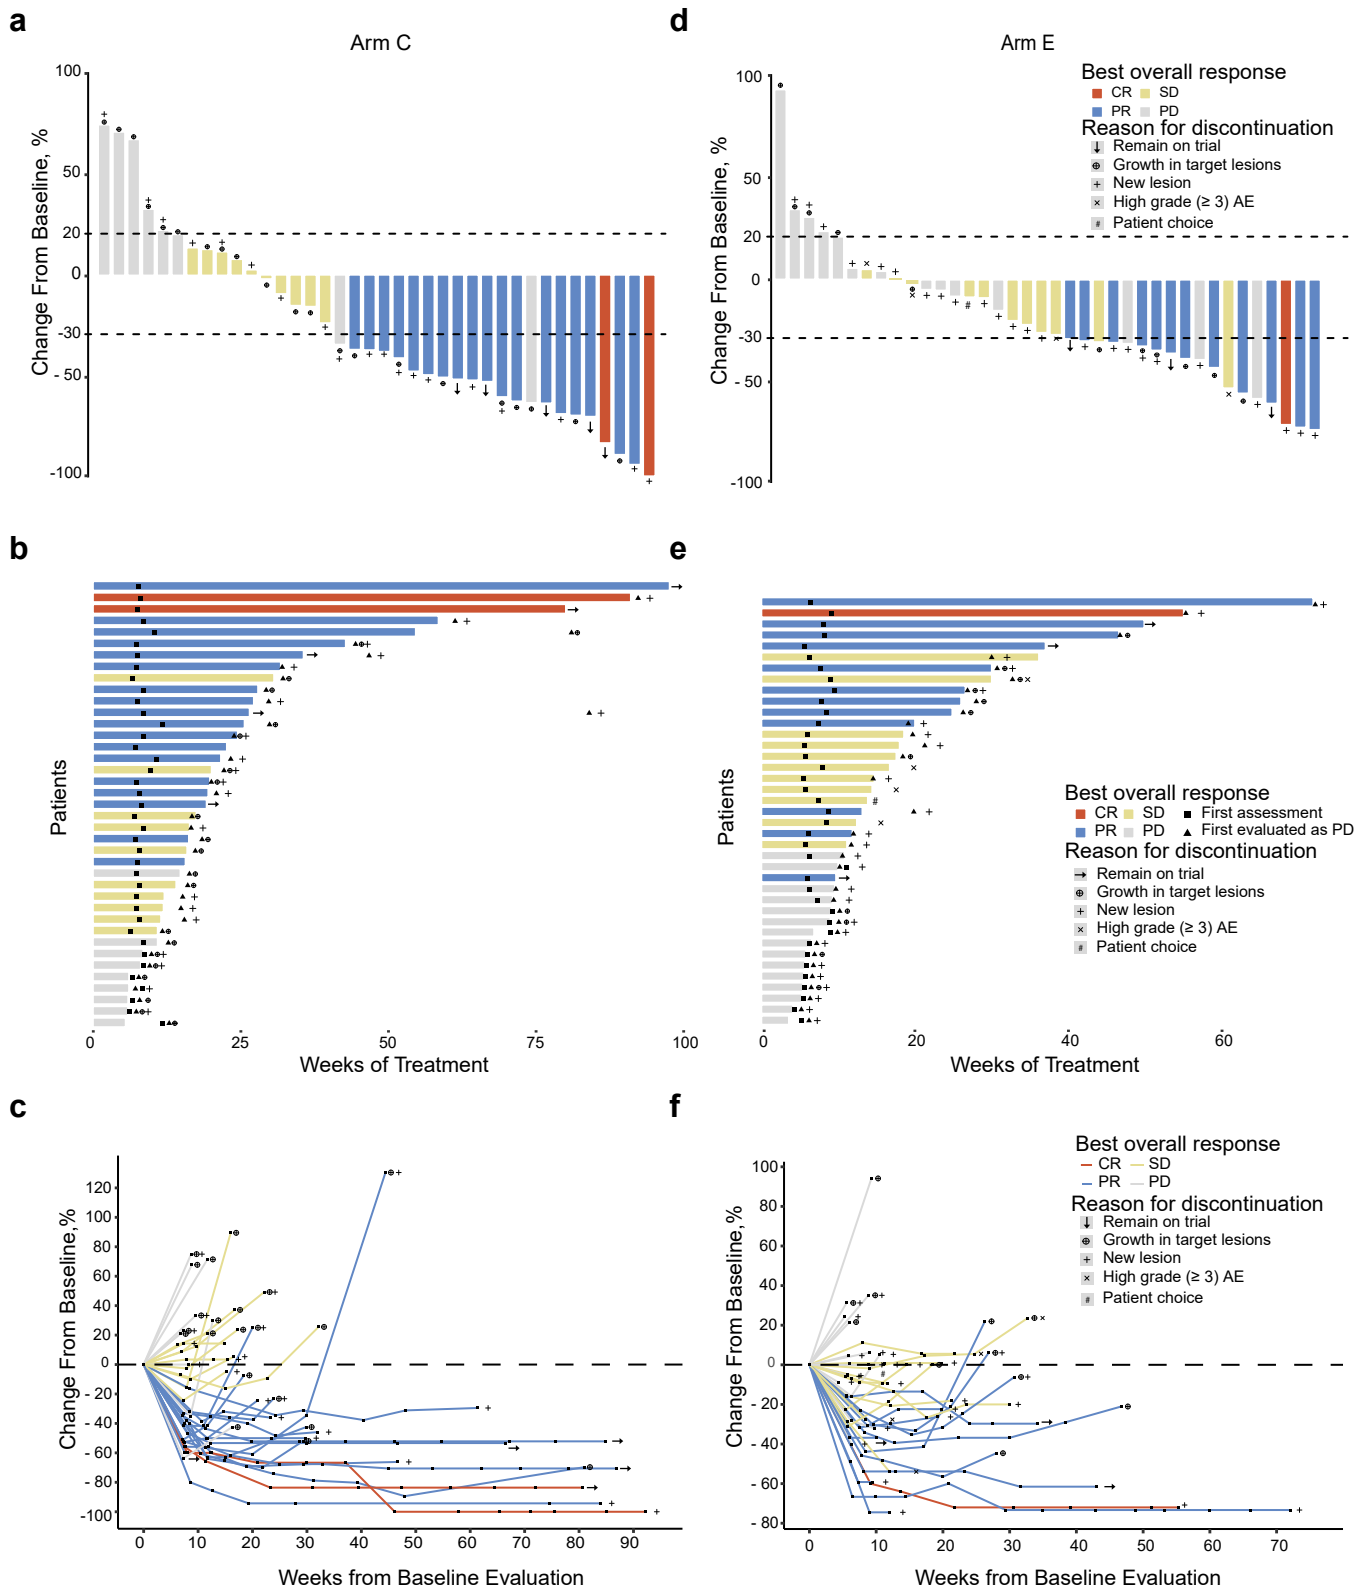

**Fig. S3 Summary of response and durability of arm C and E.**

**a, d** Best percent change in the sum of target lesions diameters (longest diameter for non-nodular lesions and short axis for nodular lesions) from baseline in arm C (**a**) and arm E (**d**). Thirty-eight patients in arm C and 38 patients in arm E with postbaseline tumor assessments of target lesions are represented in the figure, while 8 patients in arm C and 8 patients in arm E without postbaseline tumor assessments of target lesions are not shown. The dashed lines at +20% and -30% indicate thresholds for progressive disease and partial response, respectively, according to RECIST v1.1.

**b, e** Durability of treatment in arm C (**b**) and arm E (**e**).

**c, f** The longitudinal change in the sum of longest target lesions diameters from baseline in arm C (**c**) and arm E (**f**) with at least one response assessment.

**Abbreviations:** CR, complete response; PR, partial response; SD, stable disease; PD, progressive disease; AE, adverse event.
