# Supplementary material for: Subtyping-based platform guides precision medicine for heavily pretreated metastatic triple-negative breast cancer: The FUTURE phase II umbrella clinical trial
Source: PubMed Central journal article supplement (PMC10156707; doi:10.1038/s41422-023-00795-2), 2023-03-27
Supplement: 41422_2023_795_MOESM5_ESM.pdf [file 41422_2023_795_MOESM5_ESM.pdf]

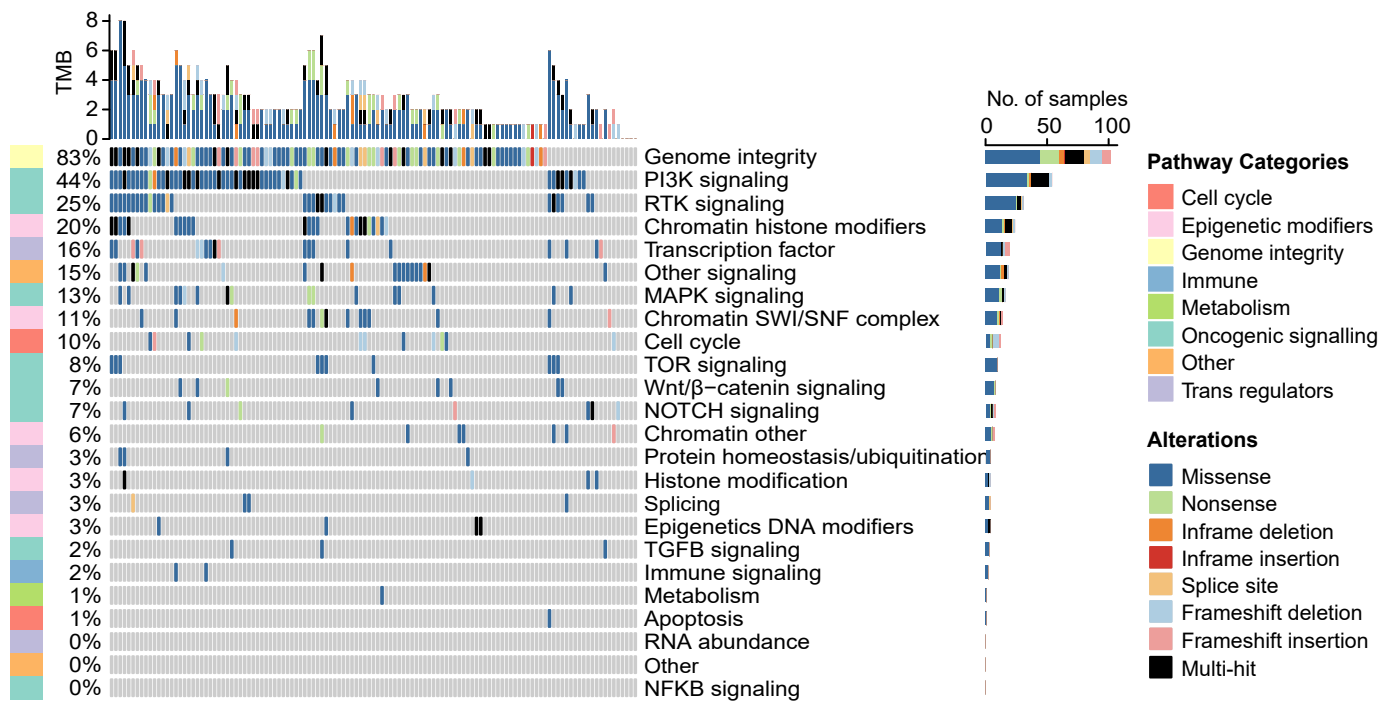

**Fig. S4 Characteristics of mutations in oncogenic signaling pathways.** The mutation counts in each sample and each pathway are provided above and on the right side, respectively.
