# Supplementary material for: Subtyping-based platform guides precision medicine for heavily pretreated metastatic triple-negative breast cancer: The FUTURE phase II umbrella clinical trial
Source: PubMed Central journal article supplement (PMC10156707; doi:10.1038/s41422-023-00795-2), 2023-03-27
Supplement: 41422_2023_795_MOESM6_ESM.pdf [file 41422_2023_795_MOESM6_ESM.pdf]

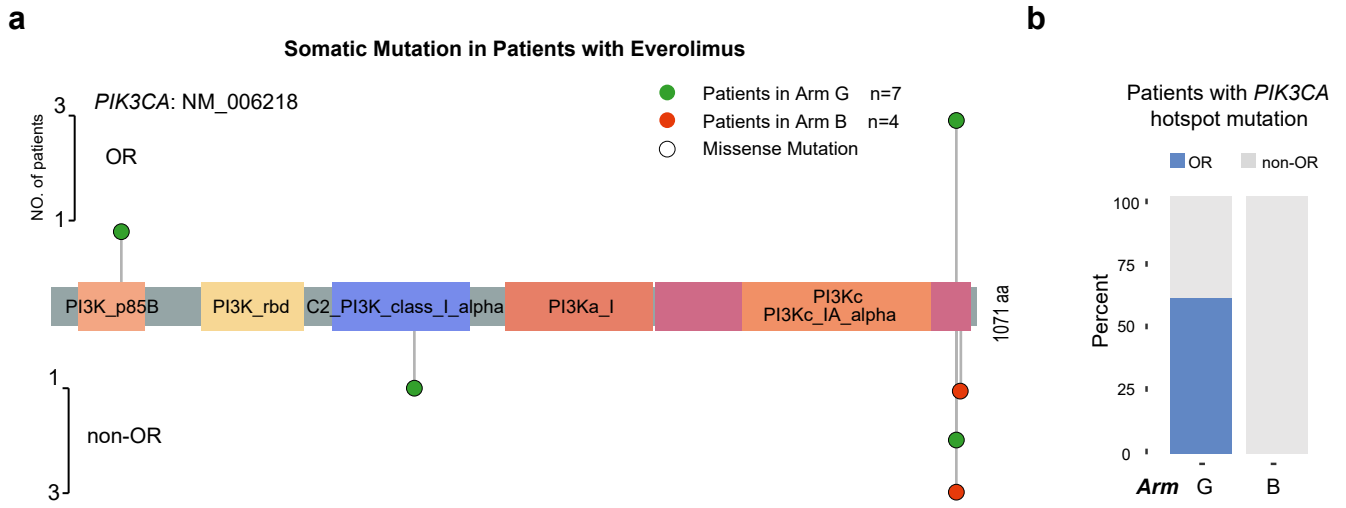

**Fig. S5 Somatic *PIK3CA* mutation site in patients with everolimus in arm B and G.**

**a** Somatic *PIK3CA* mutation sites with different responses of everolimus.

**b** Objective response rate in patients with *PIK3CA* hotspot mutation H1047.

**Abbreviations:** OR, objective response.
