# Supplementary material for: Subtyping-based platform guides precision medicine for heavily pretreated metastatic triple-negative breast cancer: The FUTURE phase II umbrella clinical trial
Source: PubMed Central journal article supplement (PMC10156707; doi:10.1038/s41422-023-00795-2), 2023-03-27
Supplement: 41422_2023_795_MOESM7_ESM.pdf [file 41422_2023_795_MOESM7_ESM.pdf]

**b**

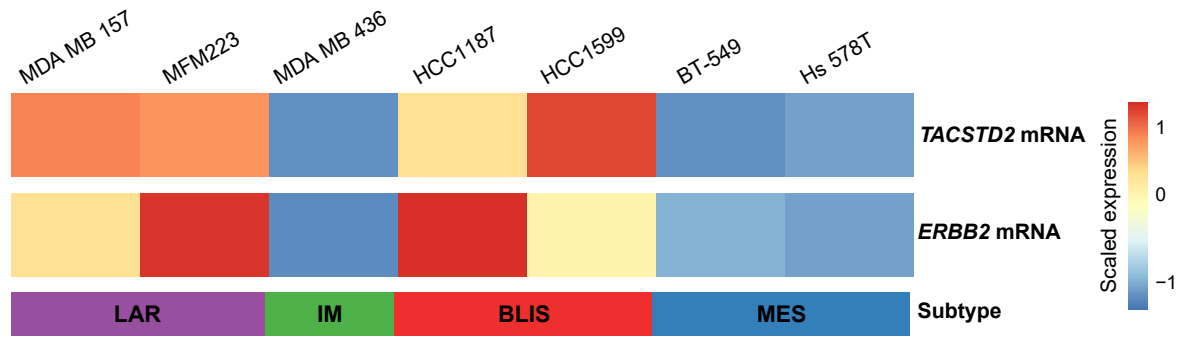

**Fig. S6 Characteristics of triple-negative breast cancer cell lines.**

**a** Hierarchical clustering to determine the subtype of TNBC cell lines based on the similarity of expression profiles between patients and cell lines.

**b** mRNA expression of *ERBB2* and *TACSTD2* in different TNBC cell lines.

**Abbreviations:** BL, basal-like; IM, immunomodulatory; MSL, mesenchymal stem-like; M, mesenchymal; UNS, unstable; LAR, luminal androgen receptor; BLIS, basal-like immune-suppressed; MES, mesenchymal-like; TNBC, triple-negative breast cancer.
