# Supplementary material for: Subtyping-based platform guides precision medicine for heavily pretreated metastatic triple-negative breast cancer: The FUTURE phase II umbrella clinical trial
Source: PubMed Central journal article supplement (PMC10156707; doi:10.1038/s41422-023-00795-2), 2023-03-27
Supplement: 41422_2023_795_MOESM8_ESM.pdf [file 41422_2023_795_MOESM8_ESM.pdf]

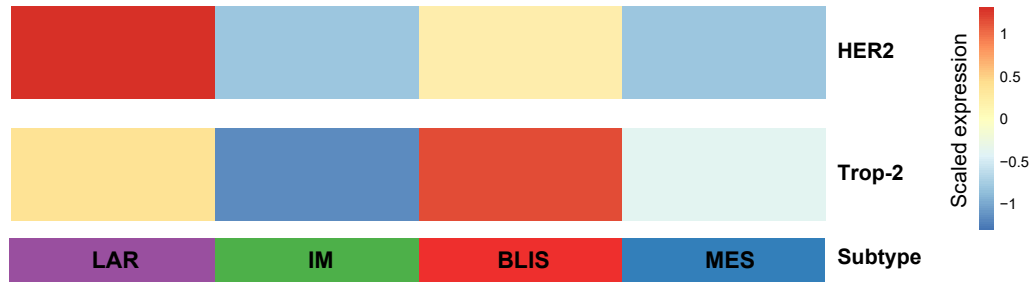

**Fig. S7 The expression of HER2 and Trop-2 in patient-derived organoids of triple-negative breast cancer by immunohistochemistry.**

**Abbreviations:** LAR, luminal androgen receptor; IM, immunomodulatory; BLIS, basal-like immune-suppressed; MES, mesenchymal-like.
