# Supplementary material for: Subtyping-based platform guides precision medicine for heavily pretreated metastatic triple-negative breast cancer: The FUTURE phase II umbrella clinical trial
Source: PubMed Central journal article supplement (PMC10156707; doi:10.1038/s41422-023-00795-2), 2023-03-27
Supplement: 41422_2023_795_MOESM9_ESM.pdf [file 41422_2023_795_MOESM9_ESM.pdf]

**Table S1. The presence of germline BRCA1/2 mutations in the FUTURE trial**

|                 | <i>BRCA1</i> | <i>BRCA2</i> |
|-----------------|--------------|--------------|
|                 | mutant       | mutant       |
| A (N = 4)       | 0            | 0            |
| B (N = 20)      | 0            | 1            |
| C (N = 46)      | 1            | 0            |
| D (N = 10)      | 9            | 1            |
| E (N = 46)      | 0            | 0            |
| F (N = 6)       | 0            | 0            |
| G (N = 9)       | 0            | 0            |
| Total (N = 141) | 10           | 2            |
