# Supplementary material for: Subtyping-based platform guides precision medicine for heavily pretreated metastatic triple-negative breast cancer: The FUTURE phase II umbrella clinical trial
Source: PubMed Central journal article supplement (PMC10156707; doi:10.1038/s41422-023-00795-2), 2023-03-27
Supplement: 41422_2023_795_MOESM10_ESM.pdf [file 41422_2023_795_MOESM10_ESM.pdf]

**Table S2. The expression of PD-L1 in the FUTURE trial**

|                 | PD-L1   |         |
|-----------------|---------|---------|
|                 | CPS <10 | CPS ≥10 |
| A (N = 3)       | 3       | 0       |
| B (N = 12)      | 8       | 4       |
| C (N = 15)      | 2       | 13      |
| D (N = 9)       | 8       | 1       |
| E (N = 28)      | 25      | 3       |
| F (N = 5)       | 5       | 0       |
| G (N = 6)       | 6       | 0       |
| Total (N = 78*) | 57      | 21      |

\* A total of 78 patients in the FUTURE trial had available FFPE sections and were successfully stained for PD-L1 (clone 22C3) by immunohistochemistry.

Abbreviations: CPS, combined positive score.
