# Supplementary material for: Subtyping-based platform guides precision medicine for heavily pretreated metastatic triple-negative breast cancer: The FUTURE phase II umbrella clinical trial
Source: PubMed Central journal article supplement (PMC10156707; doi:10.1038/s41422-023-00795-2), 2023-03-27
Supplement: 41422_2023_795_MOESM11_ESM.pdf [file 41422_2023_795_MOESM11_ESM.pdf]

**Table S3. Summary of 29 Patients without one on treatment assessment in ITT population of the FUTURE trial**

|                                                  | ITT (N=141) |      |
|--------------------------------------------------|-------------|------|
|                                                  | N           | %    |
| <b>With at least one on treatment assessment</b> | 112         | 79.4 |
| <b>Without one on treatment assessment</b>       | 29          | 20.6 |
| <b>Adverse event</b>                             | 3           | 2.1  |
| <b>Patient choice</b>                            | 9           | 6.4  |
| <b>Clinical deterioration</b>                    | 17          | 12.1 |
