# Supplementary material for: Subtyping-based platform guides precision medicine for heavily pretreated metastatic triple-negative breast cancer: The FUTURE phase II umbrella clinical trial
Source: PubMed Central journal article supplement (PMC10156707; doi:10.1038/s41422-023-00795-2), 2023-03-27
Supplement: 41422_2023_795_MOESM12_ESM.pdf [file 41422_2023_795_MOESM12_ESM.pdf]

**Table S4. Summary of survival in the FUTURE trial**

|                                | ITT (N = 141)   | A (n = 4)     | B (n = 20)    | C (n = 46)       | D (n = 10)     | E (n = 46)      | F (n = 6)    | G (n = 9)     |
|--------------------------------|-----------------|---------------|---------------|------------------|----------------|-----------------|--------------|---------------|
| Median PFS (95% CI), month     | 3.4 (2.7-4.2)   | 3.4 (0-7.3)   | 1.9 (1.7-2.1) | 4.6 (3.4-5.9)    | 2.0 (1.7-2.3)  | 3.4 (1.7-5.0)   | 1.2 (0-2.5)  | 3.0 (2.4-3.6) |
| Event, No. of patients (%)     | 111 (78.7)      | 4 (100.0)     | 14 (70.0)     | 36 (78.3)        | 8 (80.0)       | 39 (84.8)       | 5 (83.3)     | 5 (55.6)      |
| Censoring, No. of patients (%) | 30 (21.3)       | 0             | 6 (30.0)      | 10 (21.7)        | 2 (20.0)       | 7 (15.2)        | 1 (16.7)     | 4 (44.4)      |
| Median OS (95% CI), month      | 10.7 (9.1-12.3) | 16.7 (0-35.3) | 6.1 (2.8-9.4) | 16.1 (11.7-20.5) | 6.2 (1.9-10.5) | 10.1 (3.8-16.3) | 2.7 (0-17.0) | 4.5 (2.4-6.6) |
| Event, No. of patients (%)     | 90 (63.8)       | 3 (75.0)      | 17 (85.0)     | 23 (50.0)        | 8 (80.0)       | 28 (60.9)       | 5 (83.3)     | 6 (66.7)      |
| Censoring, No. of patients (%) | 51 (36.2)       | 1 (25.0)      | 3 (15.0)      | 23 (50.0)        | 2 (20.0)       | 18 (39.1)       | 1 (16.7)     | 3 (33.3)      |

Abbreviations: ITT, intention-to-treat; CI, confidence interval; PFS, progression free survival; OS, overall survival.
