# Supplementary material for: Subtyping-based platform guides precision medicine for heavily pretreated metastatic triple-negative breast cancer: The FUTURE phase II umbrella clinical trial
Source: PubMed Central journal article supplement (PMC10156707; doi:10.1038/s41422-023-00795-2), 2023-03-27
Supplement: 41422_2023_795_MOESM13_ESM.pdf [file 41422_2023_795_MOESM13_ESM.pdf]

**Table S5. Treatment-Related (including definite, possible, and probable) Adverse Events of Any Grade and Grades 3 to 4 Occurring in Each Arm**

| Adverse event             | A<br>(n = 4) |      |         |      | B<br>(n = 20) |      |         |      | C<br>(n = 46) |      |         |      | D<br>(n = 10) |      |         |      | E<br>(n = 46) |      |         |      | F<br>(n = 6) |      |         |      | G<br>(n = 9) |      |         |      | Summary<br>(n = 141) |      |           |      |         |      |   |
|---------------------------|--------------|------|---------|------|---------------|------|---------|------|---------------|------|---------|------|---------------|------|---------|------|---------------|------|---------|------|--------------|------|---------|------|--------------|------|---------|------|----------------------|------|-----------|------|---------|------|---|
|                           | Any Grade    |      | Grade≥3 |      | Any Grade     |      | Grade≥3 |      | Any Grade     |      | Grade≥3 |      | Any Grade     |      | Grade≥3 |      | Any Grade     |      | Grade≥3 |      | Any Grade    |      | Grade≥3 |      | Any Grade    |      | Grade≥3 |      | Any Grade            |      | Grade 1-2 |      | Grade≥3 |      |   |
|                           | n            | %    | n       | %    | n             | %    | n       | %    | n             | %    | n       | %    | n             | %    | n       | %    | n             | %    | n       | %    | n            | %    | n       | %    | n            | %    | n       | %    | n                    | %    | n         | %    | n       | %    | n |
| Nausea                    | 1            | 25.0 | 0       | 0.0  | 2             | 10.0 | 0       | 0.0  | 6             | 13.0 | 0       | 0.0  | 5             | 50.0 | 0       | 0.0  | 18            | 39.1 | 0       | 0.0  | 1            | 16.7 | 0       | 0.0  | 0            | 0.0  | 0       | 0.0  | 33                   | 23.4 | 33        | 23.4 | 0       | 0.0  |   |
| Anorexia                  | 2            | 50.0 | 0       | 0.0  | 0             | 0.0  | 0       | 0.0  | 2             | 4.3  | 1       | 2.2  | 1             | 25.0 | 0       | 0.0  | 12            | 26.1 | 2       | 4.3  | 4            | 66.7 | 0       | 0.0  | 0            | 0.0  | 0       | 0.0  | 21                   | 14.9 | 18        | 12.8 | 3       | 2.1  |   |
| Vomiting                  | 1            | 25.0 | 0       | 0.0  | 2             | 10.0 | 0       | 0.0  | 4             | 8.7  | 0       | 0.0  | 3             | 30.0 | 0       | 0.0  | 10            | 21.7 | 0       | 0.0  | 0            | 0.0  | 0       | 0.0  | 0            | 0.0  | 0       | 0.0  | 20                   | 14.2 | 20        | 14.2 | 0       | 0.0  |   |
| Diarrhea                  | 3            | 75.0 | 0       | 0.0  | 2             | 10.0 | 1       | 5.0  | 3             | 6.5  | 0       | 0.0  | 0             | 0.0  | 0       | 0.0  | 6             | 13.0 | 0       | 0.0  | 0            | 0.0  | 0       | 0.0  | 0            | 0.0  | 0       | 0.0  | 14                   | 9.9  | 13        | 9.2  | 1       | 0.7  |   |
| Constipation              | 0            | 0.0  | 0       | 0.0  | 0             | 0.0  | 0       | 0.0  | 1             | 2.1  | 0       | 0.0  | 1             | 10.0 | 0       | 0.0  | 1             | 2.2  | 0       | 0.0  | 0            | 0.0  | 0       | 0.0  | 0            | 0.0  | 0       | 0.0  | 3                    | 2.1  | 3         | 2.1  | 0       | 0.0  |   |
| Abdominal pain            | 0            | 0.0  | 0       | 0.0  | 1             | 5.0  | 0       | 0.0  | 0             | 0.0  | 0       | 0.0  | 0             | 0.0  | 0       | 0.0  | 2             | 4.3  | 0       | 0.0  | 0            | 0.0  | 0       | 0.0  | 0            | 0.0  | 0       | 0.0  | 3                    | 2.1  | 3         | 2.1  | 0       | 0.0  |   |
| Dyspnea                   | 0            | 0.0  | 0       | 0.0  | 1             | 7.0  | 1       | 7.1  | 1             | 2.1  | 0       | 0.0  | 0             | 0.0  | 0       | 0.0  | 3             | 6.5  | 1       | 2.2  | 1            | 16.7 | 0       | 0.0  | 0            | 0.0  | 0       | 0.0  | 6                    | 4.3  | 5         | 3.5  | 1       | 0.7  |   |
| Cough                     | 0            | 0.0  | 0       | 0.0  | 0             | 0.0  | 0       | 0.0  | 2             | 4.3  | 0       | 0.0  | 0             | 0.0  | 0       | 0.0  | 5             | 10.9 | 0       | 0.0  | 2            | 33.3 | 0       | 0.0  | 0            | 0.0  | 0       | 0.0  | 9                    | 6.4  | 9         | 6.4  | 0       | 0.0  |   |
| Fatigue                   | 1            | 25.0 | 0       | 0.0  | 3             | 15.0 | 0       | 0.0  | 12            | 26.1 | 0       | 0.0  | 1             | 10.0 | 0       | 0.0  | 19            | 41.3 | 0       | 0.0  | 2            | 33.3 | 0       | 0.0  | 2            | 22.2 | 0       | 0.0  | 40                   | 28.4 | 40        | 28.4 | 0       | 0.0  |   |
| Pyrexia                   | 0            | 0.0  | 0       | 0.0  | 0             | 0.0  | 0       | 0.0  | 5             | 10.9 | 1       | 2.2  | 0             | 0.0  | 0       | 0.0  | 1             | 2.2  | 0       | 0.0  | 1            | 16.7 | 0       | 0.0  | 1            | 11.1 | 1       | 11.1 | 8                    | 5.7  | 6         | 4.3  | 2       | 1.4  |   |
| Weight loss               | 2            | 50.0 | 0       | 0.0  | 0             | 0.0  | 0       | 0.0  | 2             | 4.3  | 0       | 0.0  | 0             | 0.0  | 0       | 0.0  | 8             | 17.4 | 0       | 0.0  | 0            | 0.0  | 0       | 0.0  | 1            | 11.1 | 0       | 0.0  | 13                   | 9.2  | 13        | 9.2  | 0       | 0.0  |   |
| Weight gain               | 0            | 0.0  | 0       | 0.0  | 0             | 0.0  | 0       | 0.0  | 1             | 2.2  | 0       | 0.0  | 0             | 0.0  | 0       | 0.0  | 0             | 0.0  | 0       | 0.0  | 0            | 0.0  | 0       | 0.0  | 0            | 0.0  | 0       | 0.0  | 1                    | 0.7  | 1         | 0.7  | 0       | 0.0  |   |
| Rash                      | 0            | 0.0  | 0       | 0.0  | 0             | 0.0  | 0       | 0.0  | 6             | 13.0 | 1*      | 2.2  | 0             | 0.0  | 0       | 0.0  | 4             | 8.7  | 0       | 0.0  | 0            | 0.0  | 0       | 0.0  | 0            | 0.0  | 0       | 0.0  | 10                   | 7.1  | 9         | 6.4  | 1       | 0.7  |   |
| Arthralgia                | 0            | 0.0  | 0       | 0.0  | 1             | 5.0  | 0       | 0.0  | 2             | 4.3  | 0       | 0.0  | 1             | 10.0 | 0       | 0.0  | 2             | 4.3  | 0       | 0.0  | 0            | 0.0  | 0       | 0.0  | 0            | 0.0  | 0       | 0.0  | 6                    | 4.3  | 6         | 4.3  | 0       | 0.0  |   |
| Myalgia                   | 0            | 0.0  | 0       | 0.0  | 0             | 0.0  | 0       | 0.0  | 3             | 6.5  | 0       | 0.0  | 1             | 10.0 | 0       | 0.0  | 0             | 0.0  | 0       | 0.0  | 0            | 0.0  | 0       | 0.0  | 0            | 0.0  | 0       | 0.0  | 4                    | 2.8  | 4         | 2.8  | 0       | 0.0  |   |
| Back pain                 | 0            | 0.0  | 0       | 0.0  | 1             | 5.0  | 0       | 0.0  | 0             | 0.0  | 0       | 0.0  | 0             | 0.0  | 0       | 0.0  | 1             | 2.2  | 0       | 0.0  | 1            | 16.7 | 1       | 16.7 | 0            | 0.0  | 0       | 0.0  | 3                    | 2.1  | 2         | 1.4  | 1       | 0.7  |   |
| Pruritus                  | 0            | 0.0  | 0       | 0.0  | 1             | 5.0  | 0       | 0.0  | 1             | 2.2  | 0       | 0.0  | 0             | 0.0  | 0       | 0.0  | 1             | 2.2  | 0       | 0.0  | 0            | 0.0  | 0       | 0.0  | 0            | 0.0  | 0       | 0.0  | 3                    | 2.1  | 3         | 2.1  | 0       | 0.0  |   |
| Mucositis                 | 2            | 50.0 | 0       | 0.0  | 2             | 10.0 | 0       | 0.0  | 3             | 6.5  | 0       | 0.0  | 1             | 10.0 | 0       | 0.0  | 6             | 13.0 | 0       | 0.0  | 3            | 50.0 | 0       | 0.0  | 3            | 33.3 | 0       | 0.0  | 20                   | 14.2 | 20        | 14.2 | 0       | 0.0  |   |
| Hoarseness                | 0            | 0.0  | 0       | 0.0  | 0             | 0.0  | 0       | 0.0  | 1             | 2.2  | 0       | 0.0  | 0             | 0.0  | 0       | 0.0  | 1             | 2.2  | 0       | 0.0  | 0            | 0.0  | 0       | 0.0  | 0            | 0.0  | 0       | 0.0  | 2                    | 1.4  | 2         | 1.4  | 0       | 0.0  |   |
| PPE                       | 1            | 25.0 | 0       | 0.0  | 0             | 0.0  | 0       | 0.0  | 2             | 4.3  | 0       | 0.0  | 0             | 0.0  | 0       | 0.0  | 17            | 37.0 | 4       | 8.7  | 1            | 16.7 | 0       | 0.0  | 0            | 0.0  | 0       | 0.0  | 20                   | 14.2 | 17        | 12.1 | 3       | 2.1  |   |
| Peripheral neuropathy     | 1            | 25.0 | 0       | 0.0  | 3             | 15.0 | 0       | 0.0  | 20            | 43.5 | 0       | 0.0  | 0             | 0.0  | 0       | 0.0  | 9             | 19.6 | 0       | 0.0  | 0            | 0.0  | 0       | 0.0  | 1            | 11.0 | 0       | 0.0  | 34                   | 24.1 | 34        | 24.1 | 0       | 0.0  |   |
| Pneumonia                 | 0            | 0.0  | 0       | 0.0  | 1             | 5.0  | 0       | 0.0  | 2             | 4.3  | 0       | 0.0  | 0             | 0.0  | 0       | 0.0  | 1             | 2.2  | 0       | 0.0  | 0            | 0.0  | 0       | 0.0  | 4            | 44.4 | 2       | 22.2 | 8                    | 5.7  | 6         | 4.3  | 2       | 1.4  |   |
| Hypertension              | 0            | 0.0  | 0       | 0.0  | 0             | 0.0  | 0       | 0.0  | 2             | 4.3  | 0       | 0.0  | 1             | 10.0 | 0       | 0.0  | 22            | 47.8 | 6       | 13.0 | 3            | 50.0 | 1       | 16.7 | 1            | 0.0  | 0       | 0.0  | 29                   | 20.6 | 22        | 15.6 | 7       | 5.0  |   |
| Anemia                    | 1            | 25.0 | 0       | 0.0  | 8             | 40.0 | 4       | 20.0 | 29            | 63.0 | 5       | 10.9 | 5             | 50.0 | 1       | 10.0 | 25            | 54.3 | 3       | 6.5  | 4            | 66.7 | 1       | 16.7 | 5            | 55.6 | 3       | 33.3 | 78                   | 55.3 | 61        | 43.3 | 17      | 12.1 |   |
| Leukopenia                | 1            | 25.0 | 0       | 0.0  | 6             | 30.0 | 0       | 0.0  | 34            | 73.9 | 12      | 26.1 | 4             | 40.0 | 1       | 10.0 | 25            | 54.3 | 6       | 13.0 | 4            | 66.7 | 1       | 16.7 | 8            | 88.9 | 2       | 22.2 | 82                   | 58.2 | 60        | 42.6 | 22      | 15.6 |   |
| Neutropenia               | 1            | 25.0 | 0       | 0.0  | 3             | 15.0 | 1       | 5.0  | 23            | 50.0 | 11      | 23.9 | 3             | 30.0 | 2       | 20.0 | 15            | 32.6 | 4       | 8.7  | 4            | 66.7 | 2       | 33.3 | 2            | 22.2 | 1       | 11.1 | 51                   | 36.2 | 30        | 21.3 | 21      | 14.9 |   |
| Thrombocytopenia          | 1            | 25.0 | 0       | 0.0  | 6             | 30.0 | 3       | 15.0 | 12            | 26.1 | 3       | 6.5  | 5             | 50.0 | 4       | 40.0 | 16            | 34.8 | 2       | 4.3  | 3            | 50.0 | 1       | 16.7 | 5            | 55.6 | 1       | 0.0  | 48                   | 34.0 | 34        | 24.1 | 14      | 9.9  |   |
| Elevated ALT/AST          | 1            | 25.0 | 0       | 0.0  | 5             | 25.0 | 0       | 0.0  | 10            | 21.7 | 2       | 4.3  | 0             | 0.0  | 0       | 0.0  | 13            | 28.3 | 2       | 4.3  | 3            | 50.0 | 0       | 0.0  | 3            | 33.3 | 0       | 0.0  | 35                   | 24.8 | 32        | 22.7 | 3       | 2.1  |   |
| Proteinuria               | 0            | 0.0  | 0       | 0.0  | 0             | 0.0  | 0       | 0.0  | 1             | 2.2  | 0       | 0.0  | 0             | 0.0  | 0       | 0.0  | 16            | 34.8 | 4       | 8.7  | 5            | 83.3 | 1       | 16.7 | 0            | 0.0  | 0       | 0.0  | 21                   | 14.9 | 17        | 12.1 | 4       | 2.8  |   |
| Urinary occult blood      | 0            | 0.0  | 0       | 0.0  | 0             | 0.0  | 0       | 0.0  | 0             | 0.0  | 0       | 0.0  | 1             | 10.0 | 1       | 10.0 | 0             | 0.0  | 0       | 0.0  | 1            | 16.7 | 0       | 0.0  | 0            | 0.0  | 0       | 0.0  | 2                    | 1.4  | 1         | 0.7  | 1       | 0.7  |   |
| RCCEP                     | 0            | 0.0  | 0       | 0.0  | 0             | 0.0  | 0       | 0.0  | 28            | 60.9 | 1       | 2.2  | 0             | 0.0  | 0       | 0.0  | 0             | 0.0  | 0       | 0.0  | 0            | 0.0  | 0       | 0.0  | 0            | 0.0  | 0       | 0.0  | 28                   | 19.9 | 27        | 19.1 | 1       | 0.7  |   |
| Allergic purpura          | 0            | 0.0  | 0       | 0.0  | 1             | 5.0  | 0       | 0.0  | 0             | 0.0  | 0       | 0.0  | 0             | 0.0  | 0       | 0.0  | 0             | 0.0  | 0       | 0.0  | 0            | 0.0  | 0       | 0.0  | 0            | 0.0  | 0       | 0.0  | 1                    | 0.7  | 1         | 0.7  | 0       | 0.0  |   |
| Hypoalbuminemia           | 0            | 0.0  | 0       | 0.0  | 0             | 0.0  | 0       | 0.0  | 1             | 2.2  | 0       | 0.0  | 0             | 0.0  | 0       | 0.0  | 1             | 2.2  | 0       | 0.0  | 0            | 0.0  | 0       | 0.0  | 0            | 0.0  | 0       | 0.0  | 2                    | 1.4  | 2         | 1.4  | 0       | 0.0  |   |
| Sepsis                    | 0            | 0.0  | 0       | 0.0  | 1             | 5.0  | 0       | 0.0  | 0             | 0.0  | 0       | 0.0  | 0             | 0.0  | 0       | 0.0  | 0             | 0.0  | 0       | 0.0  | 0            | 0.0  | 0       | 0.0  | 0            | 0.0  | 0       | 0.0  | 1                    | 0.7  | 0         | 0.0  | 1       | 0.7  |   |
| Hypothyroidism            | 0            | 0.0  | 0       | 0.0  | 0             | 0.0  | 0       | 0.0  | 4             | 8.7  | 1       | 2.2  | 0             | 0.0  | 0       | 0.0  | 2             | 4.3  | 0       | 0.0  | 0            | 0.0  | 0       | 0.0  | 0            | 0.0  | 0       | 0.0  | 6                    | 4.3  | 5         | 3.5  | 1       | 0.7  |   |
| Infusion related reaction | 0            | 0.0  | 0       | 0.0  | 0             | 0.0  | 0       | 0.0  | 4             | 8.7  | 0       | 0.0  | 0             | 0.0  | 0       | 0.0  | 0             | 0.0  | 0       | 0.0  | 0            | 0.0  | 0       | 0.0  | 0            | 0.0  | 0       | 0.0  | 4                    | 2.8  | 4         | 2.8  | 0       | 0.0  |   |
| Blood bilirubin increased | 0            | 0.0  | 0       | 0.0  | 0             | 0.0  | 0       | 0.0  | 2             | 4.3  | 0       | 0.0  | 0             | 0.0  | 0       | 0.0  | 3             | 6.5  | 0       | 0.0  | 0            | 0.0  | 0       | 0.0  | 0            | 0.0  | 0       | 0.0  | 4                    | 2.8  | 4         | 2.8  | 0       | 0.0  |   |
| Creatinine increased      | 0            | 0.0  | 0       | 0.0  | 0             | 0.0  | 0       | 0.0  | 1             | 2.2  | 0       | 0.0  | 1             | 10.0 | 0       | 0.0  | 1             | 2.2  | 0       | 0.0  | 0            | 0.0  | 0       | 0.0  | 0            | 0.0  | 0       | 0.0  | 3                    | 2.1  | 3         | 2.1  | 0       | 0.0  |   |
| Hyperglycemia             | 0            | 0.0  | 0       | 0.0  | 0             | 0.0  | 0       | 0.0  | 2             | 4.3  | 1       | 2.2  | 0             | 0.0  | 0       | 0.0  | 1             | 2.2  | 0       | 0.0  | 0            | 0.0  | 0       | 0.0  | 0            | 0.0  | 0       | 0.0  | 3                    | 2.1  | 2         | 1.4  | 1       | 0.7  |   |
| Hypokalemia               | 1            | 25.0 | 1       | 25.0 | 0             | 0.0  | 0       | 0.0  | 0             | 0.0  | 0       | 0.0  | 0             | 0.0  | 0       | 0.0  | 0             | 0.0  | 0       | 0.0  | 0            | 0.0  | 0       | 0.0  | 0            | 0.0  | 0       | 0.0  | 1                    | 0.7  | 0         | 0.0  | 1       | 0.7  |   |
| stroke                    | 0            | 0.0  | 0       | 0.0  | 0             | 0.0  | 0       | 0.0  | 0             | 0.0  | 0       | 0.0  | 0             | 0.0  | 0       | 0.0  | 1             | 2.2  | 1       | 2.2  | 0            | 0.0  | 0       | 0.0  | 0            | 0.0  | 0       | 0.0  | 1                    | 0.7  | 0         | 0.0  | 1       | 0.7  |   |
| Edema limbs               | 0            | 0.0  | 0       | 0.0  | 0             | 0.0  | 0       | 0.0  | 7             | 15.2 | 0       | 0.0  | 0             | 0.0  | 0       | 0.0  | 2             | 4.3  | 0       | 0.0  | 0            | 0.0  | 0       | 0.0  | 0            | 0.0  | 0       | 0.0  | 9                    | 6.4  | 9         | 6.4  | 0       | 0.0  |   |
| Skin Ulceration           | 0            | 0.0  | 0       | 0.0  | 0             | 0.0  | 0       | 0.0  | 0             | 0.0  | 0       | 0.0  | 0             | 0.0  | 0       | 0.0  | 3             | 6.5  | 0       | 0.0  | 0            | 0.0  | 0       | 0.0  | 0            | 0.0  | 0       | 0.0  | 3                    | 2.1  | 0         | 0.0  | 3       | 2.1  |   |

Thrombosis 0 0.0 0 0.0 0 0.0 0 0.0 2 4.3 0 0.0 0 0.0 0 0.0 0 0.0 0 0.0 0 0.0 0 0.0 0 0.0 0 0.0 0 0.0 2 1.4 2 1.4 0 0.0

Abbreviations: ALT, alanine aminotransferase; AST, aspartate transaminase; PPE, Palmar-plantar erythrodysesthesia; RCCEP, reactive cutaneous capillary endothelial proliferation.
