# Supplementary material for: Subtyping-based platform guides precision medicine for heavily pretreated metastatic triple-negative breast cancer: The FUTURE phase II umbrella clinical trial
Source: PubMed Central journal article supplement (PMC10156707; doi:10.1038/s41422-023-00795-2), 2023-03-27
Supplement: 41422_2023_795_MOESM14_ESM.pdf [file 41422_2023_795_MOESM14_ESM.pdf]

**Table S6. Subgroup analysis of confirmed ORR in ITT population**

| Characteristic                     | OR (N) | Non-OR (N) | ORR, 95% CI (%)  |
|------------------------------------|--------|------------|------------------|
| <b>Age, years</b>                  |        |            |                  |
| 10-50                              | 14     | 56         | 20.0 (11.4-31.3) |
| 51-70                              | 28     | 43         | 39.4 (28.0-51.7) |
| <b>Number of metastatic organs</b> |        |            |                  |
| 1-3                                | 35     | 65         | 35.0 (25.7-45.2) |
| >3                                 | 7      | 34         | 17.1 (7.2-32.1)  |
| <b>ECOG</b>                        |        |            |                  |
| 0-1                                | 40     | 85         | 32.0 (23.9-40.9) |
| 2                                  | 2      | 14         | 12.5 (1.6-38.3)  |
| <b>DFI (months)</b>                |        |            |                  |
| <6                                 | 11     | 42         | 20.8 (10.8-34.1) |
| ≥6                                 | 23     | 41         | 35.9 (24.3-48.9) |
| NA (Stage IV)                      | 8      | 16         | 33.3 (15.6-55.3) |
| <b>First-line PFS (months)</b>     |        |            |                  |
| <3                                 | 13     | 35         | 27.1 (15.3-41.8) |
| 3-6                                | 11     | 31         | 26.2 (13.9-42.0) |
| >6                                 | 15     | 20         | 42.9 (26.3-60.6) |
| unknown                            | 3      | 13         | 18.8 (4.0-45.6)  |
| <b>Previous lines of treatment</b> |        |            |                  |
| <3                                 | 15     | 41         | 26.8 (15.8-40.3) |
| ≥3                                 | 27     | 58         | 31.8 (22.1-42.8) |

**Abbreviations:** ITT, intention-to-treat; ORR, objective response rate; OR, objective response; CI, confidence interval; N, number; ECOG, Eastern Cooperative Oncology Group; DFI, disease free interval; NA, not available; PFS, progression free survival.
