# Supplementary material for: Subtyping-based platform guides precision medicine for heavily pretreated metastatic triple-negative breast cancer: The FUTURE phase II umbrella clinical trial
Source: PubMed Central journal article supplement (PMC10156707; doi:10.1038/s41422-023-00795-2), 2023-03-27
Supplement: 41422_2023_795_MOESM15_ESM.pdf [file 41422_2023_795_MOESM15_ESM.pdf]

**Table S7. Sequencing gene content of the prospective cohort.**

|         |         |         |           |          |         |        |          |        |         |                  |
|---------|---------|---------|-----------|----------|---------|--------|----------|--------|---------|------------------|
| ABCB1   | BTK     | CRIP1   | FER       | HRAS     | KMT2B   | MEN1   | OR2L2    | PREX2  | RPGR    | TEP1             |
| ABL1    | BUB1B   | CRK     | FES       | HSP90AA1 | KMT2C   | MERTK  | OR6A2    | PRKAA1 | RPS6KA1 | TERT             |
| ADA     | CACNA1D | CSF1R   | FGFR1     | HSP90AB1 | KMT2D   | MET    | PAK1     | PRKACA | RPS6KA3 | TET2             |
| AFF2    | CAMK2G  | CSF3R   | FGFR2     | HSP90B1  | KRAS    | MICA   | PAK2     | PRKACB | RPS6KA5 | TGFBR1           |
| AKAP3   | CASP8   | CSNK1E  | FGFR3     | HSPA4    | LCK     | MIEN1  | PAK3     | PRKCA  | RPS6KB1 | TKTL1            |
| AKT1    | CAV3    | CSNK2A1 | FGFR4     | IGF1     | LPL     | MLH1   | PALB2    | PRKCB  | RPTOR   | TLR4             |
| AKT2    | CBFB    | CTCF    | FGR       | IGF1R    | LYN     | MLLT4  | PARP1    | PRKCD  | RRM1    | TLR9             |
| AKT3    | CBL     | CTCFL   | FH        | IKBKB    | MAP1A   | MMP1   | PARP2    | PRKCE  | RRM2    | TNFRSF11A        |
| ALDH1A1 | CBLB    | CUL4A   | FLT1      | IL15RA   | MAP1B   | MMP14  | PBRM1    | PRKCG  | RUNX1   | TNK2             |
| ALK     | CCL1    | CUX1    | FLT3      | IL2      | MAP2    | MMP2   | PCID2    | PRKCQ  | RYR2    | TNKS2            |
| ALOX5   | CCL2    | CYP19A1 | FLT4      | IL7R     | MAP2K1  | MMP3   | PDE4B    | PRKCZ  | S100B   | TOP1             |
| ANKRD11 | CCL20   | CYP2C8  | FOXA1     | INSR     | MAP2K2  | MMP9   | PDE4C    | PRKDC  | S1PR2   | TOP2A            |
| APC     | CCL7    | CYP2C9  | FOXO3     | INSRR    | MAP2K4  | MSH2   | PDE4D    | PRKG1  | SETD2   | TOP2B            |
| APP     | CCL8    | CYP3A4  | FOXP1     | IRAK1    | MAP3K1  | MST1R  | PDGFB    | PRKX   | SF3B1   | TOP3A            |
| ARAF    | CCND1   | DCAF4L2 | FOXQ1     | IRF4     | MAP3K13 | MTAP   | PDGFRA   | PRMT2  | SGK1    | TOP3B            |
| ARID1A  | CCND2   | DEK     | FRK       | IRS1     | MAP3K2  | MTHFR  | PDGFRB   | PTEN   | SGK2    | TP53             |
| ARID1B  | CCND3   | DGKG    | FSIP1     | IRS2     | MAP3K4  | MTOR   | PDPK1    | PTGS2  | SHC1    | TPMT             |
| ARID2   | CCNE1   | DNMT1   | FYN       | ITCH     | MAP3K5  | MYB    | PEG10    | PTK2   | SHH     | TPRX1            |
| ASXL1   | CD274   | DNMT3A  | GAB2      | ITGB3    | MAP3K6  | MYC    | PFKFB3   | PTK2B  | SIK2    | TRIM47           |
| ATM     | CDC25A  | DNMT3B  | GATA3     | ITGB4    | MAP3K7  | NCOA1  | PGR      | PTK6   | SIRT1   | TRIM65           |
| ATN1    | CDC25B  | DUSP7   | GHRL      | ITK      | MAP4    | NCOR1  | PHF6     | PTPN22 | SIRT7   | TRIM6-<br>TRIM34 |
| ATP2B2  | CDC25C  | DYRK1A  | GLIS3     | JAK1     | MAP4K3  | NEK2   | PHKA2    | PTPRD  | SLC19A3 | TRPS1            |
| ATR     | CDH1    | ECT2L   | GNAS      | JAK2     | MAP4K4  | NF1    | PI4K2A   | PTPRN2 | SLC5A1  | TSC1             |
| ATRX    | CDH16   | EGFR    | GOLPH3L   | JAK3     | MAP4K5  | NF2    | PI4KB    | PVT1   | SMAD4   | TSC2             |
| AURKA   | CDK16   | EHMT2   | GPR32     | JUN      | MAP7    | NFIB   | PIK3C3   | RAB25  | SMARCA4 | TTK              |
| AURKB   | CDK2    | EPAS1   | GPS2      | KAT6A    | MAPK1   | NFKB1  | PIK3CA   | RAC1   | SMO     | TUSC5            |
| AURKC   | CDK4    | EPHA1   | GRB7      | KAT8     | MAPK10  | NFKB2  | PIK3CB   | RAC2   | SMYD3   | TYK2             |
| AXIN1   | CDK6    | EPHA2   | GRIN2A    | KCNB2    | MAPK13  | NFKBIA | PIK3CD   | RAD18  | SOCS2   | TYRO3            |
| AXL     | CDKN1B  | EPHA3   | GSK3A     | KCNJ12   | MAPK14  | NOS1   | PIK3CG   | RAD20  | SOX9    | UNC13D           |
| BAK1    | CDKN2A  | EPHB1   | GSK3B     | KCNJ14   | MAPK3   | NOS2   | PIK3R1   | RAD51  | SPEN    | USH2A            |
| BAX     | CDKN2B  | EPHB2   | HDAC1     | KCNJ2    | MAPK4   | NOS3   | PIK3R2   | RAF1   | SRC     | USP9X            |
| BCL2    | CETP    | EPHB4   | HDAC2     | KCNJ3    | MAPK6   | NOTCH1 | PIKFYVE  | RASAL1 | SRMS    | VHL              |
| BCL2A1  | CHEK1   | EPST11  | HDAC4     | KCNJ5    | MAPK7   | NOTCH2 | PIM1     | RB1    | SSTR5   | VPS4B            |
| BCL2L2  | CHEK2   | ERBB2   | HDAC5     | KCNJ6    | MAPK8   | NOTCH3 | PIWIL1   | RBM17  | ST8SIA4 | WEE1             |
| BCOR    | CHML    | ERBB3   | HDAC6     | KCNJ9    | MAPRE2  | NR1H2  | PKD1     | RECQL5 | STAG2   | WHSC1L1          |
| BCR     | CHRNA4  | ERBB4   | HDAC7     | KDM1B    | MAPRE3  | NR1H4  | PLCG1    | REL    | STAT1   | WNK3             |
| BIRC2   | CHUK    | ERCC4   | HDAC9     | KDM4A    | MAPT    | NR2F2  | PLK2     | RET    | STAT5A  | WNT7A            |
| BIRC3   | CIC     | ESR1    | HIF1A     | KDM5A    | MAST2   | NR3C1  | PLK3     | RFC1   | STAT5B  | XBP1             |
| BLK     | CLEC19A | EXO1    | HIST1H1C  | KDM6A    | MCL1    | NRAS   | PMS2     | RGMB   | STK11   | XDH              |
| BMP7    | CNOT3   | FAAH    | HIST1H2BC | KDR      | MDM2    | NTRK1  | PNPLA3   | RHOA   | SYK     | YES1             |
| BMX     | CNR1    | FAM47C  | HIST1H3B  | KIF11    | MDM4    | NTRK2  | PPAPDC1B | RICTOR | TBL1XR1 | ZAP70            |
| BRAF    | COL1A1  | FANCD2  | HK2       | KIF26B   | MECOM   | OGG1   | PPARA    | RIPK1  | TBX3    | ZBP1             |
| BRCA1   | COL2A1  | FASN    | HK3       | KIT      | MECP2   | OPCML  | PPARG    | ROCK1  | TEC     | ZFP36L1          |
| BRCA2   | CREBBP  | FBXW7   | HMGCR     | KLLN     | MED23   | OR2G3  | PRDM1    | ROCK2  | TEK     | ZHX2             |
